# Supplementary material for: PET Evidence of the Effect of Donepezil on Cognitive Performance in an Animal Model of Chemobrain
Source: PubMed Central journal article supplement (PMC4983340; doi:10.1155/2016/6945415), 2016-07-31

## **Supplemental figure legends**

### **Supplemental figure 1.**

Complete section of Figure 2. Brain regions showing decreased (blue) or increased (red) FDG brain uptake. *T*-map was overlaid on the rat brain template.

### **Supplemental figure 2.**

The number of choline acetyltransferase (ChAT) immunostained nuclei in the hippocampal CA1 and CA3 regions of the experimental groups. Photographs showing the distribution of ChAT-immunoreactive cells in the hippocampus of the different groups: normal without any treatment (A), cyclophosphamide-treated (B), cyclophosphamide-treated and donepezil administered for intervention (C), doxorubicin-treated (D) and doxorubicin-treated and donepezil administered for intervention (E). Sections were cut coronally at 30  $\mu\text{m}$ .

Supplemental Fig 1a

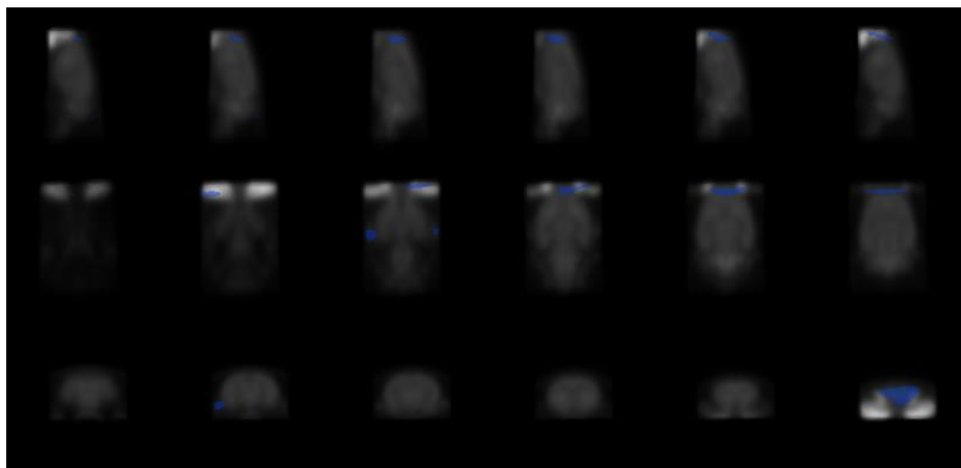

Supplemental Fig 1b

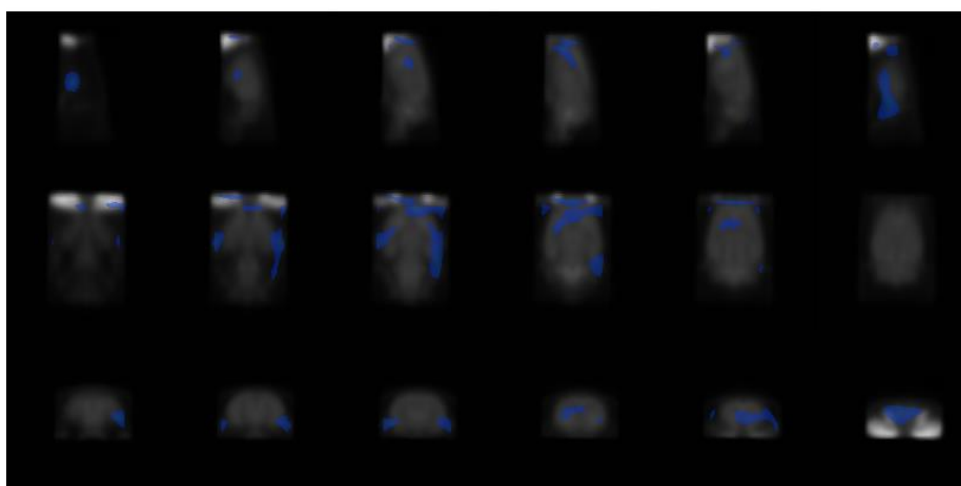

Supplemental Fig 1c

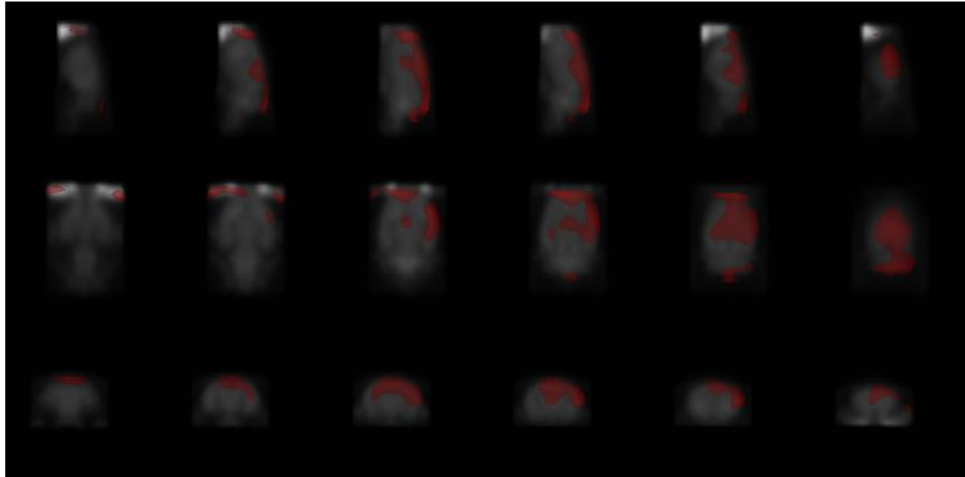

Supplemental Fig 1d

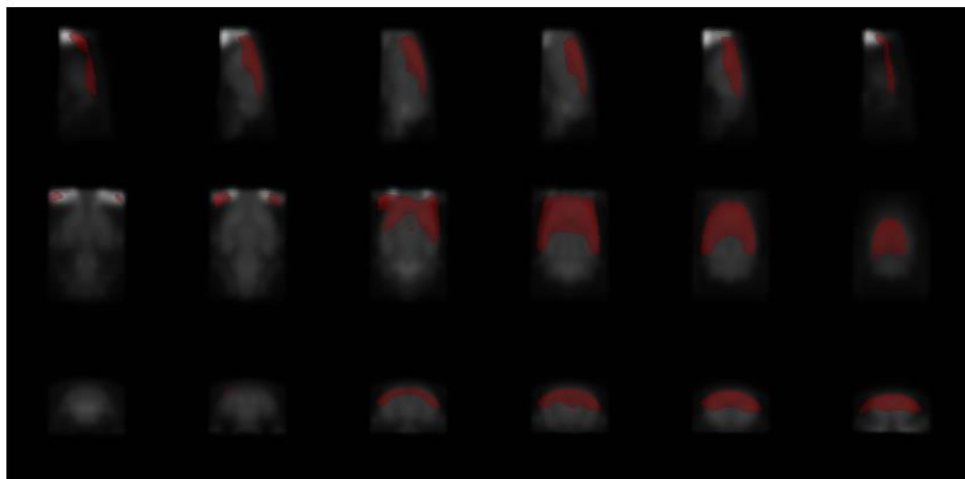

Supplemental Fig 2

CA1

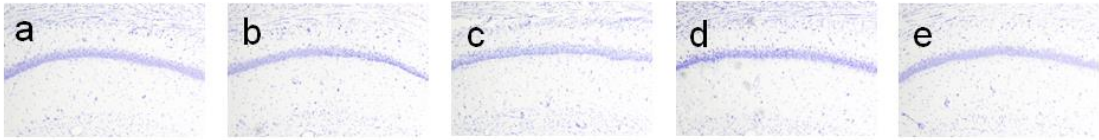

CA3

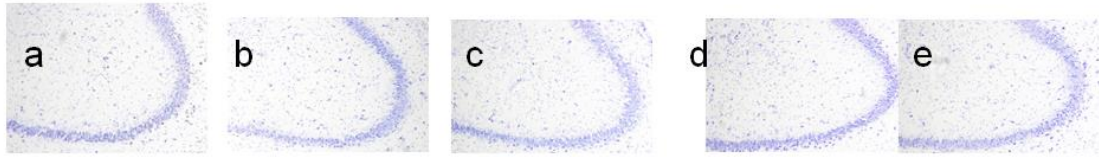

Supplement: 6945415.f1.pdf [file 6945415.f1.pdf]
